# Supplementary material for: Demethylation at enhancer upregulates MCM2 and NUP37 expression predicting poor survival in hepatocellular carcinoma patients
Source: PubMed Central journal article supplement (PMC8800332; doi:10.1186/s12967-022-03249-2), 2022-01-29

Well: B3  
Assay: 1.CG08889930-S  
Sample ID: P1  
Sequence to analyze: RCAAATATTATAATAAAAAATAACAT

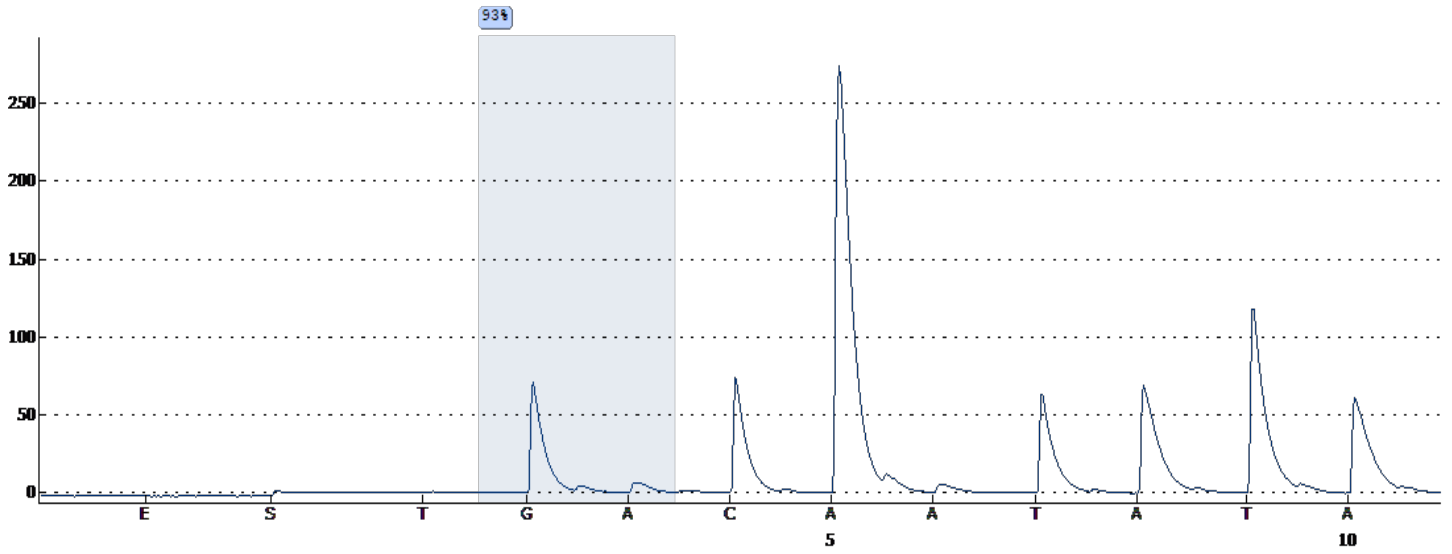

Well: B4  
Assay: 1.CG08889930-S  
Sample ID: P3  
Sequence to analyze: RCAAATATTATAATAAAAAATAACAT

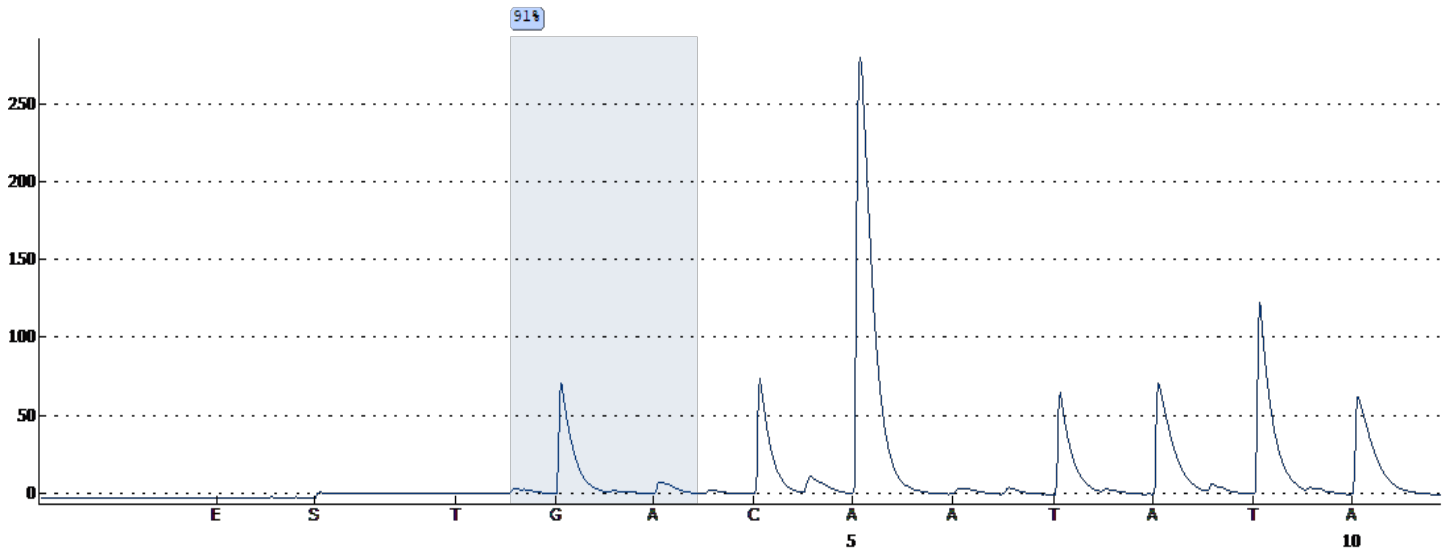

Well: B5  
Assay: 1.CG08889930-S  
Sample ID: P4  
Sequence to analyze: RCAAATATTATAATAAAAAATAACAT

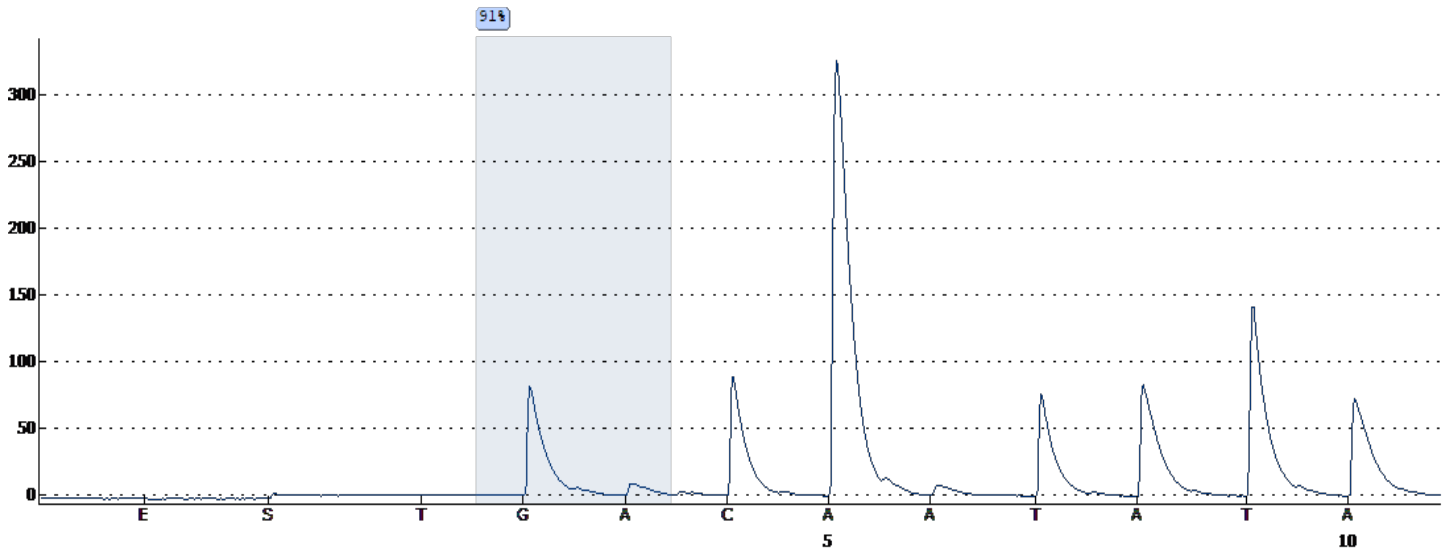

Well: B6  
Assay: 1.CG08889930-S  
Sample ID: P5  
Sequence to analyze: RCAAATATTATAATAAAAAATAACAT

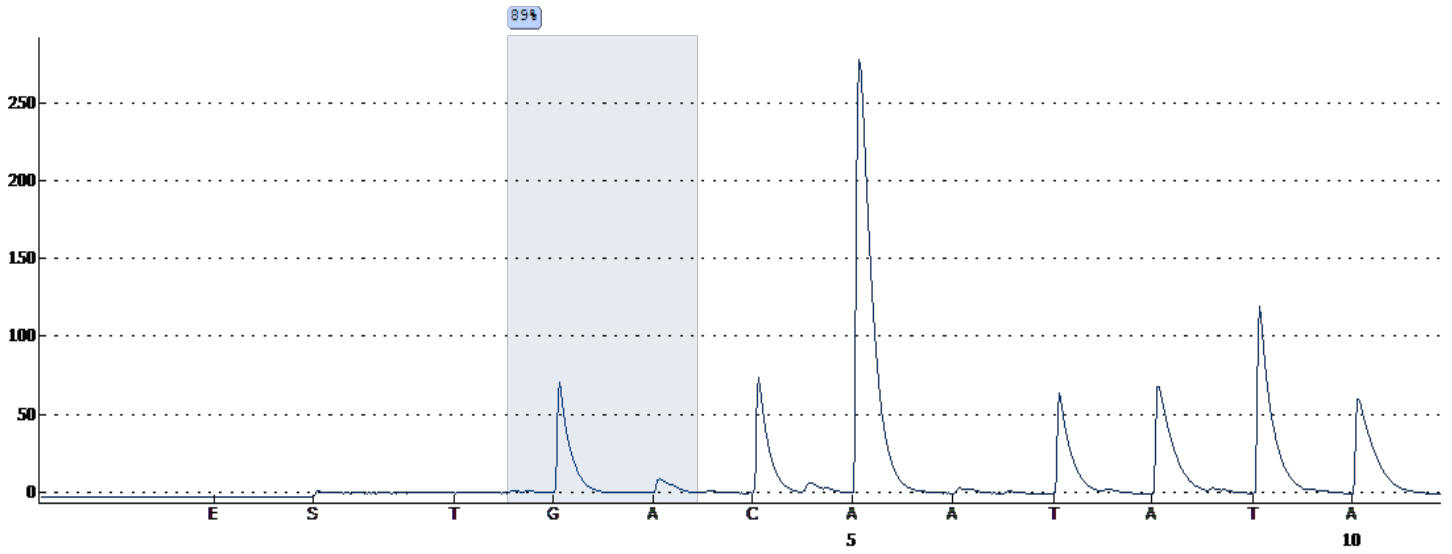

Well: B7  
Assay: 1.CG08889930-S  
Sample ID: P6  
Sequence to analyze: RCAAATATTATAATAAAAAATAACAT

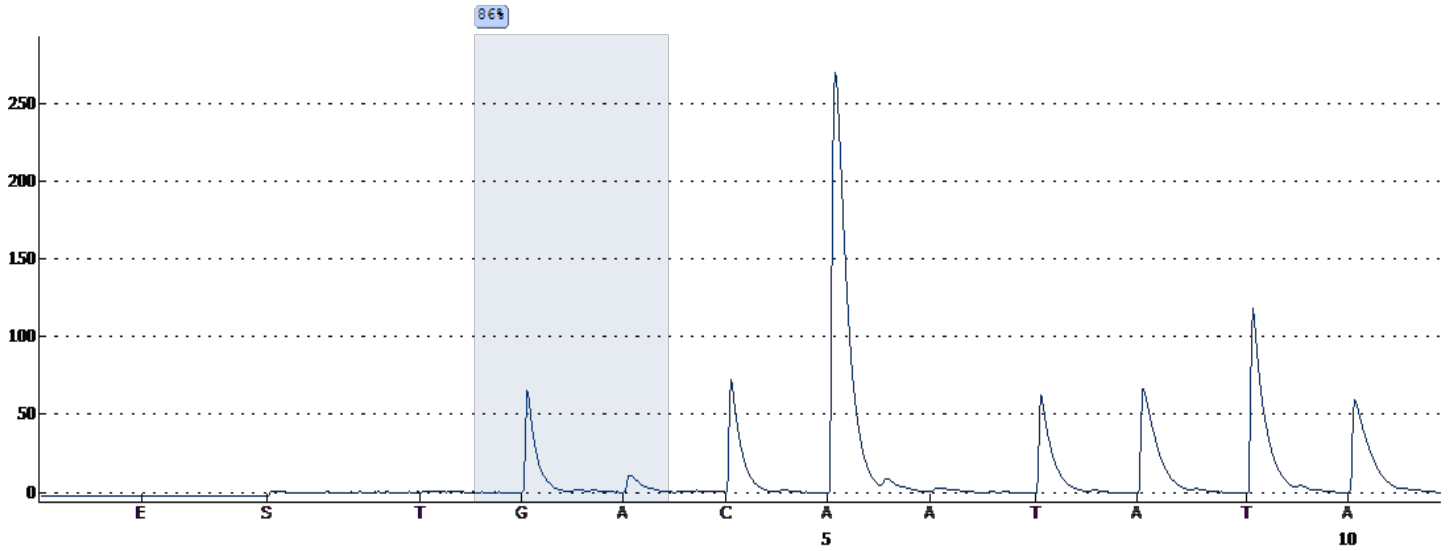

Well: B8  
Assay: 1.CG08889930-S  
Sample ID: T1  
Sequence to analyze: RCAAATATTATAATAAAAAATAACAT

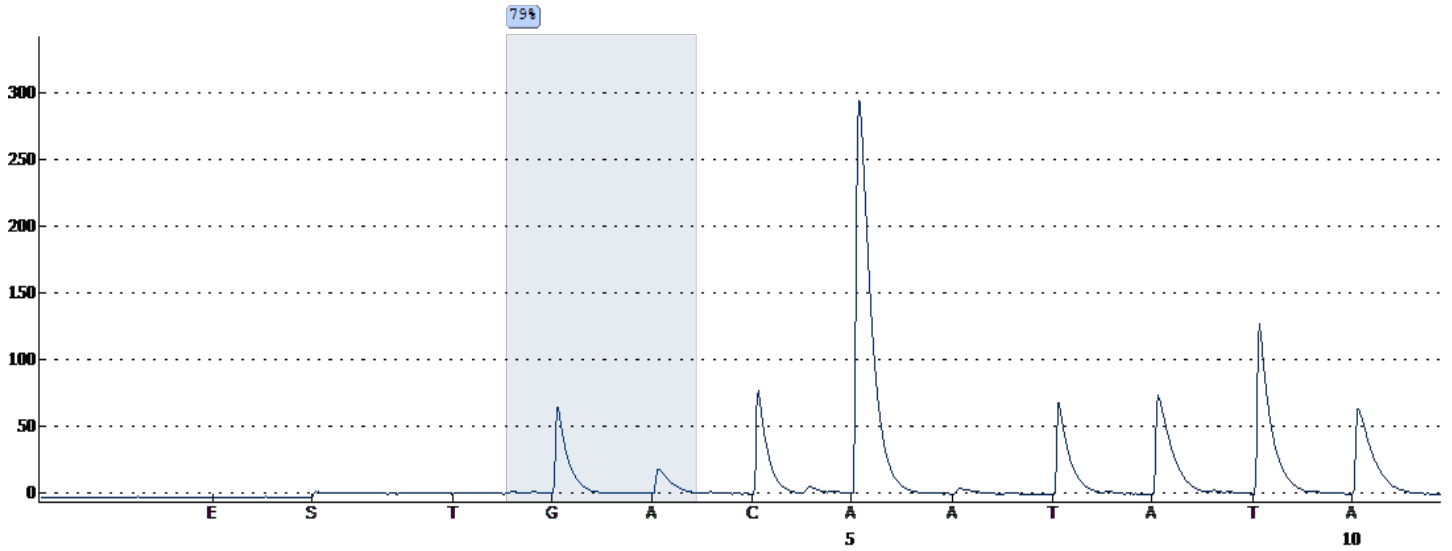

Well: B9  
Assay: 1.CG08889930-S  
Sample ID: T3  
Sequence to analyze: RCAAATATTATAATAAAAAATAACAT

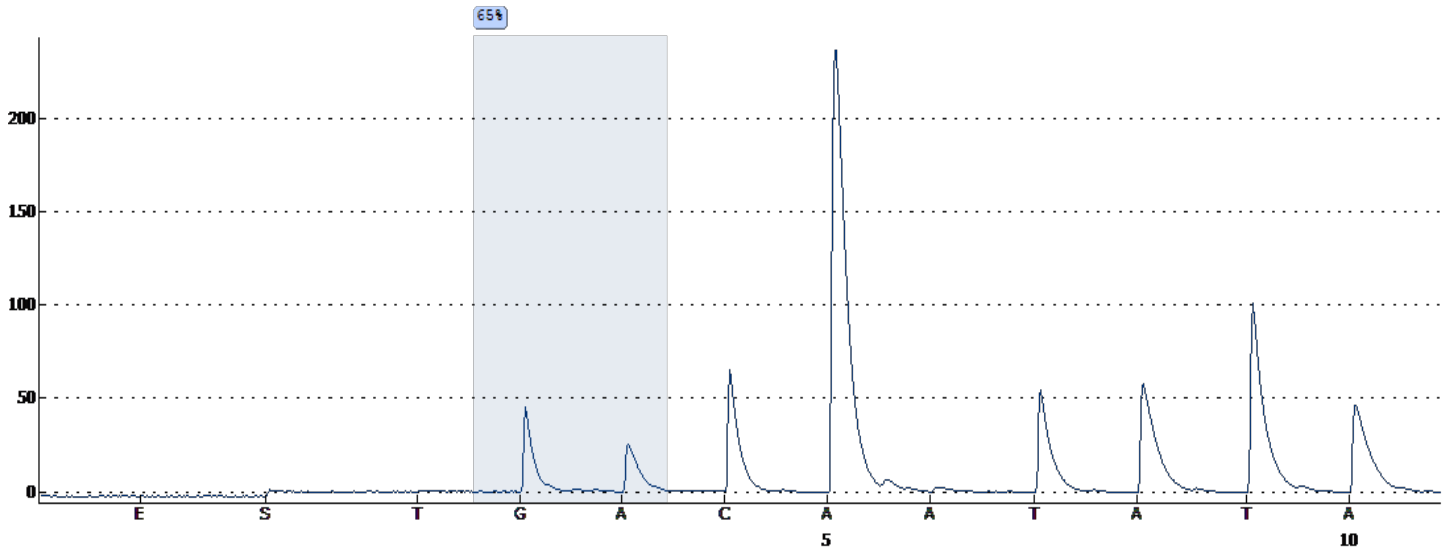

Well: B10  
Assay: 1.CG08889930-S  
Sample ID: T4  
Sequence to analyze: RCAAATATTATAATAAAAAATAACAT

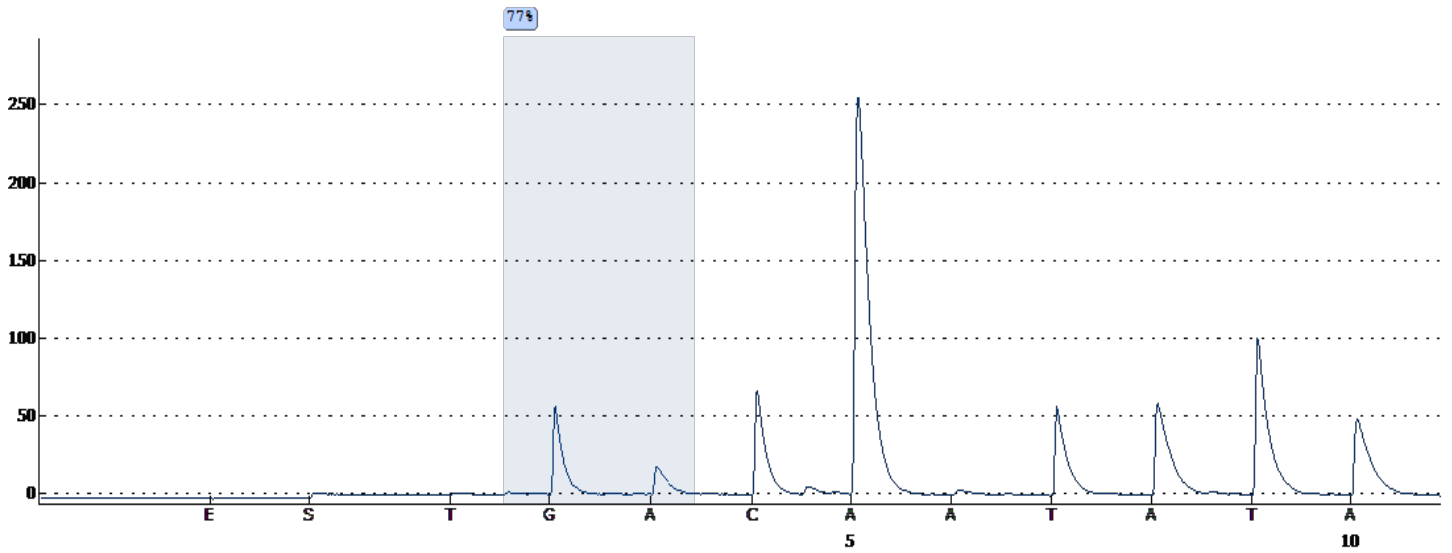

Well: B11  
Assay: 1.CG08889930-S  
Sample ID: T5  
Sequence to analyze: RCAAATATTATAATAAAAAATAACAT

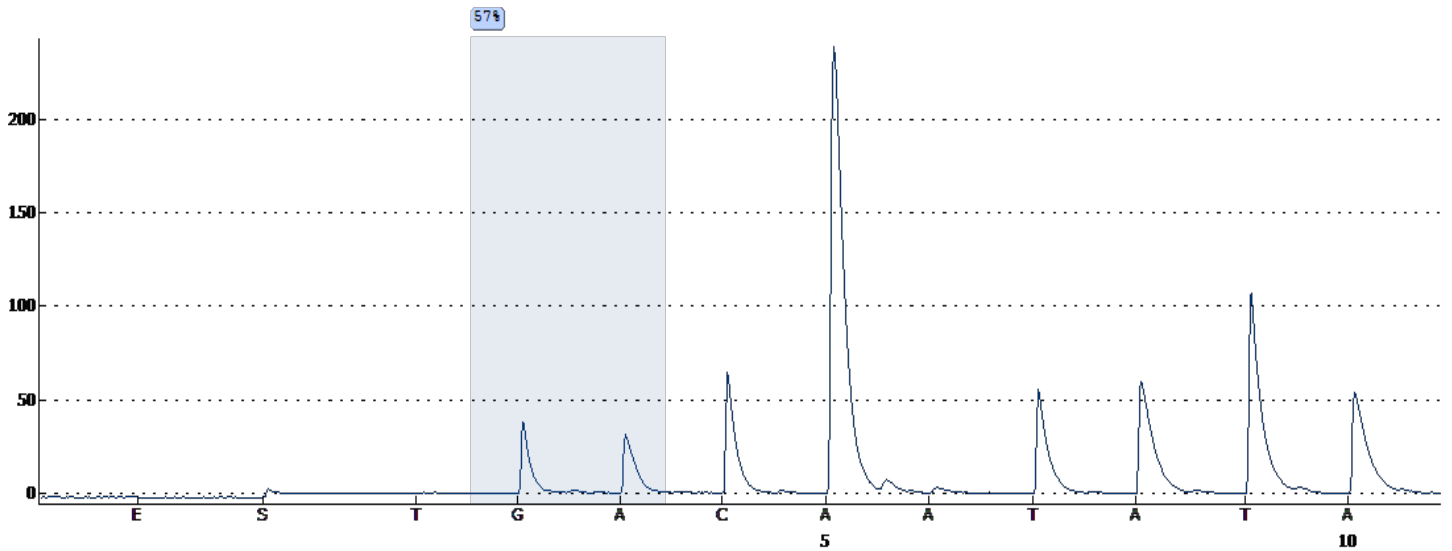

Well: B12  
Assay: 1.CG08889930-S  
Sample ID: T6  
Sequence to analyze: RCAAATATTATAATAAAATAACAT

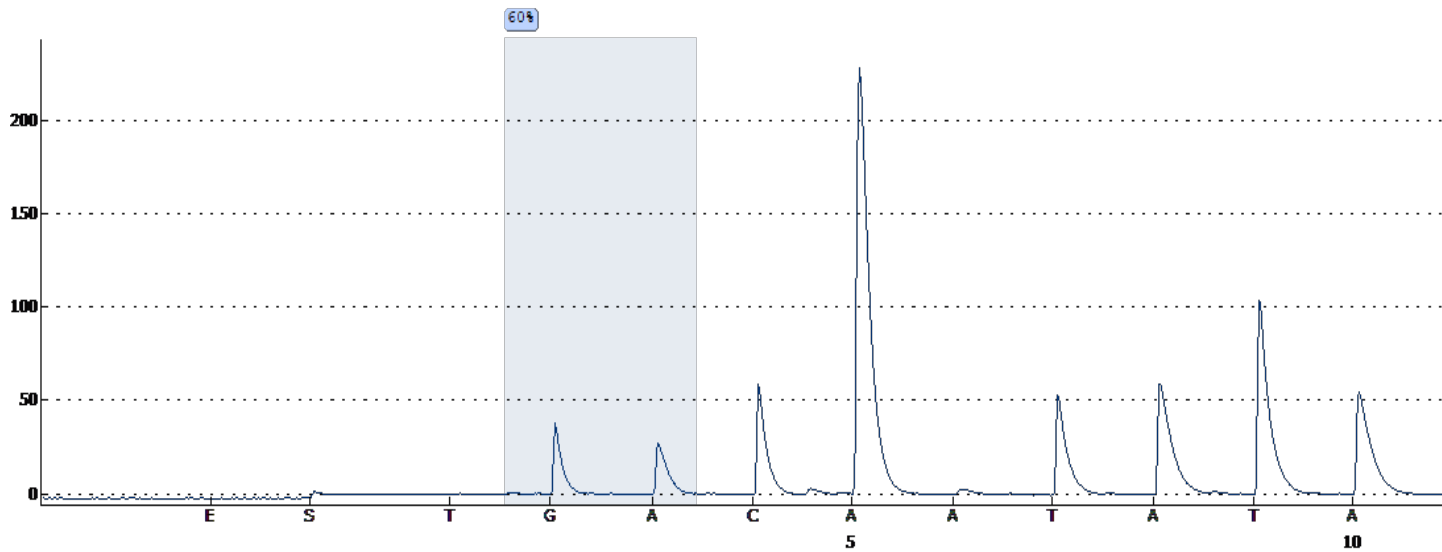

Well: C1  
Assay: 2.CG03502446-S  
Sample ID: P1  
Sequence to analyze: GGTGGGYGGTYGGTAGAAAAGTATTT

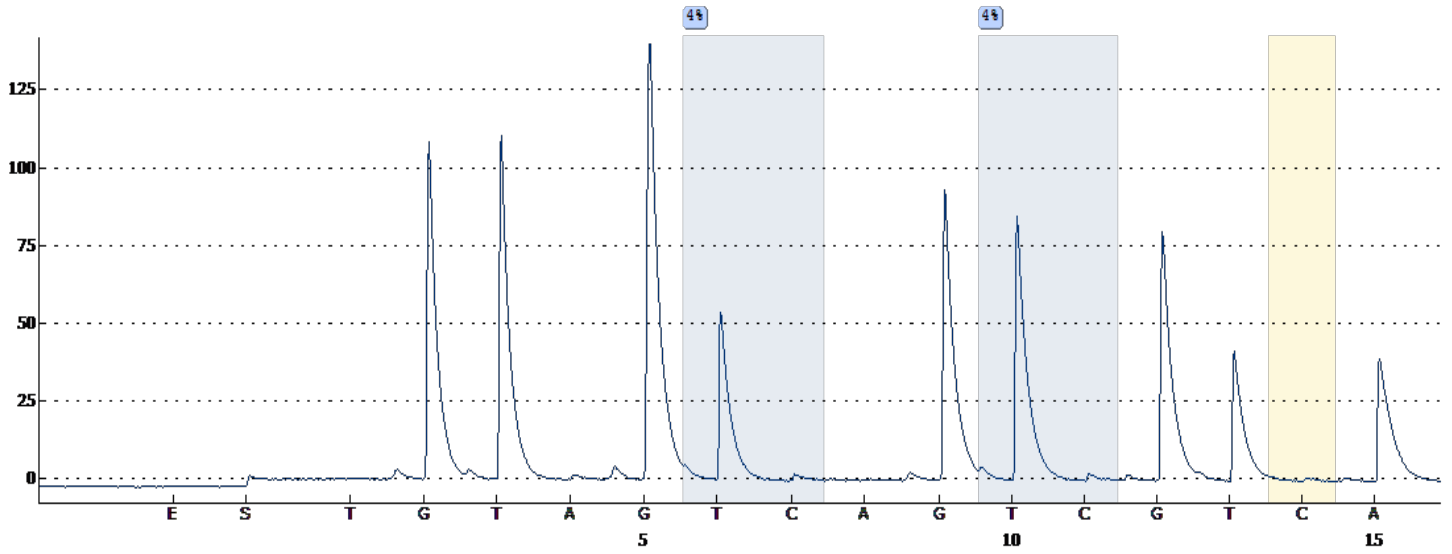

Well: C2  
Assay: 2.CG03502446-S  
Sample ID: P3  
Sequence to analyze: GGTGGGYGGTYGGTAGAAAAGTATTT

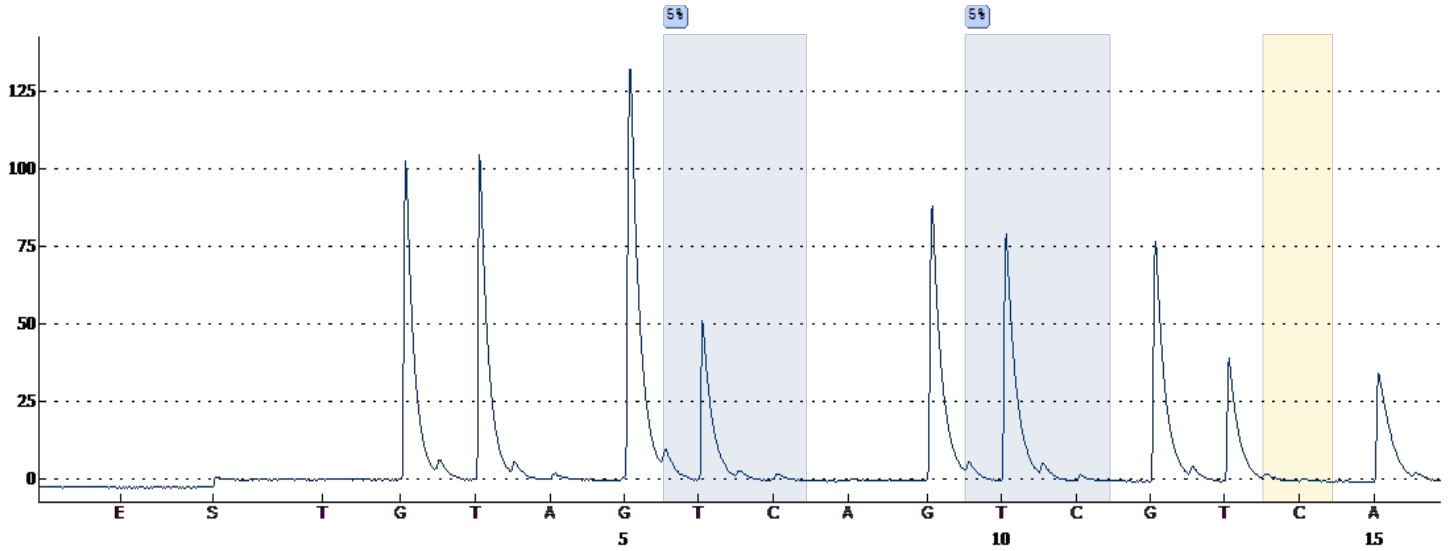

Well: C3  
Assay: 2.CG03502446-S  
Sample ID: P4  
Sequence to analyze: GGTGGGYGGTYGGTAGAAAAGTATTT

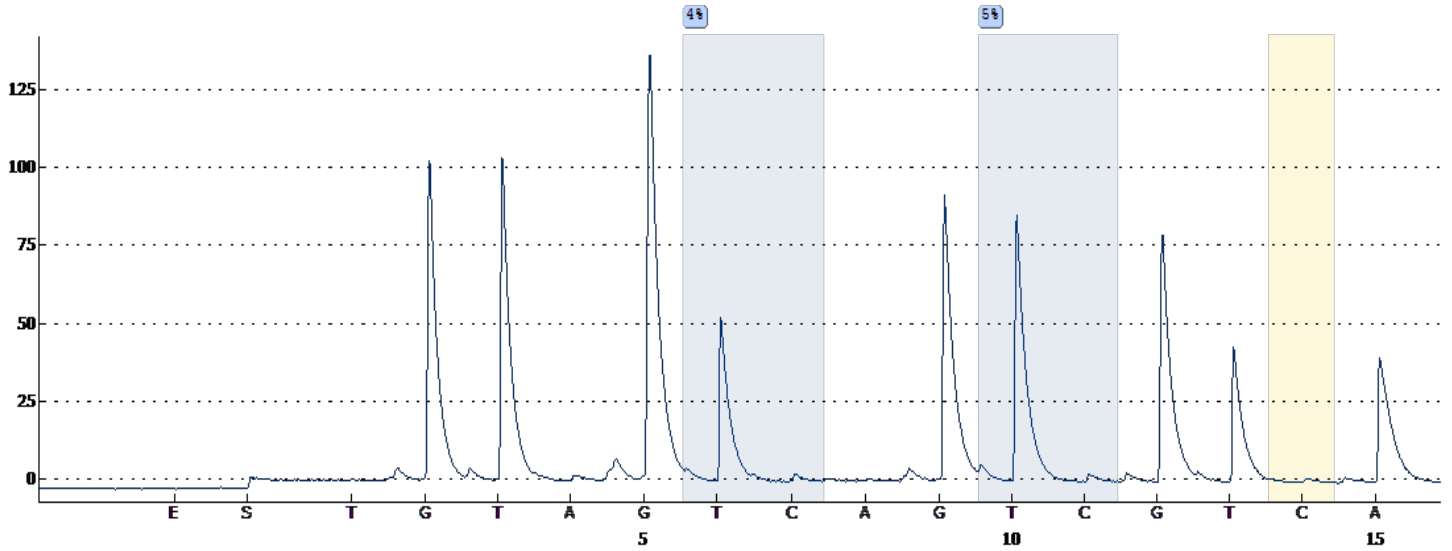

Well: C4  
Assay: 2.CG03502446-S  
Sample ID: P5  
Sequence to analyze: GGTTGGGYGGTYGGTAGAAAAGTATTT

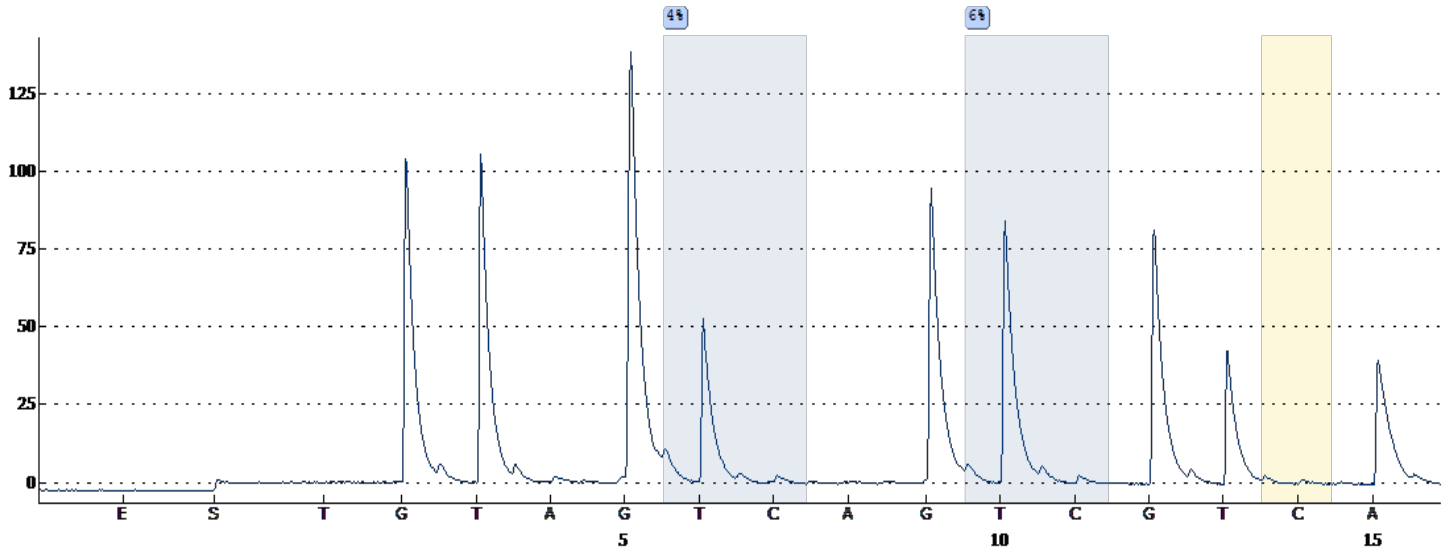

Well: C5  
Assay: 2.CG03502446-S  
Sample ID: P6  
Sequence to analyze: GGTTGGGYGGTYGGTAGAAAAGTATTT

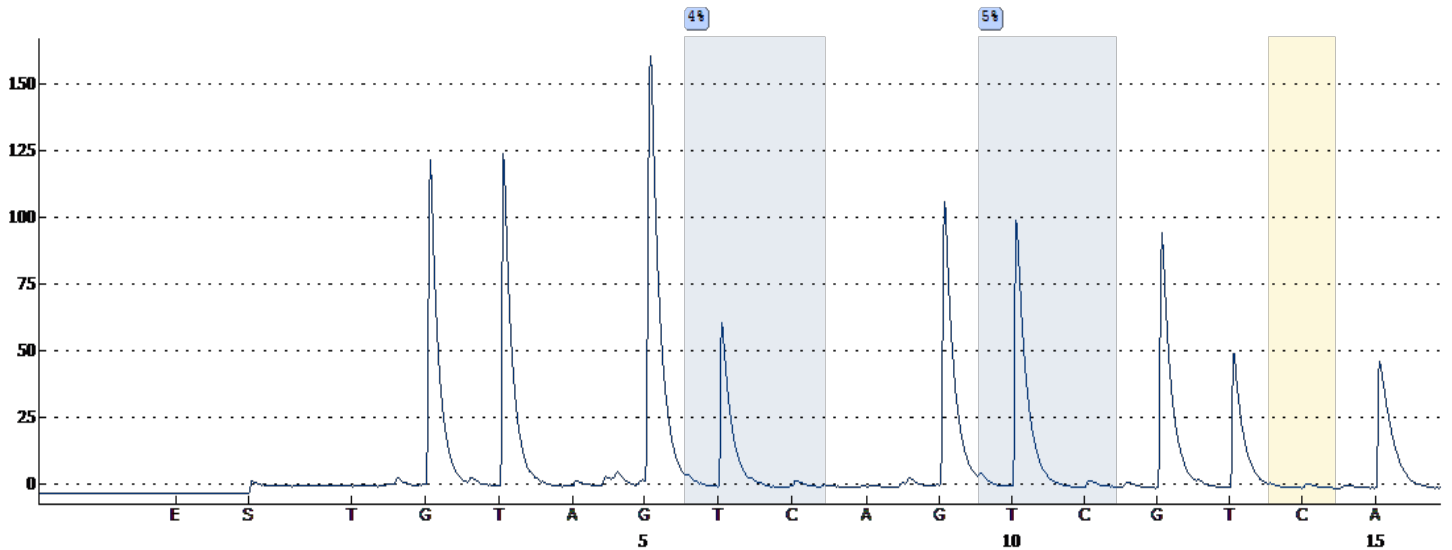

Well: C6  
Assay: 2.CG03502446-S  
Sample ID: T1  
Sequence to analyze: GGTTGGGYGGTYGGTAGAAAAGTATTT

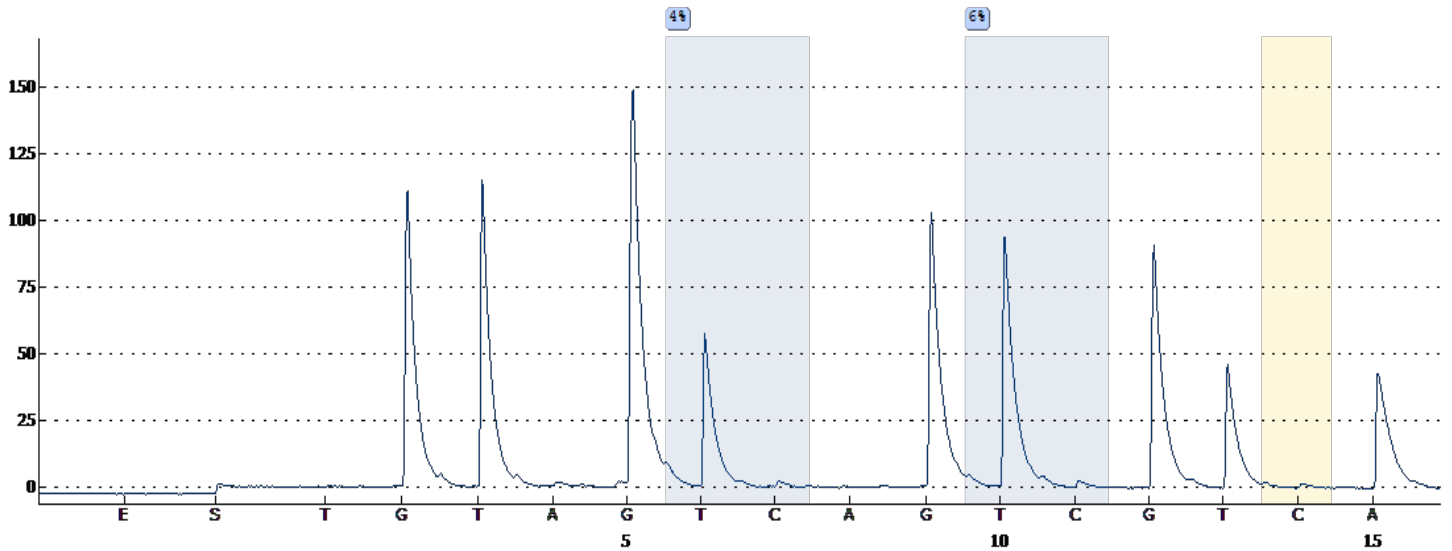

Well: C7  
Assay: 2.CG03502446-S  
Sample ID: T3  
Sequence to analyze: GGTGGGYGGTYGGTAGAAAAGTATTT

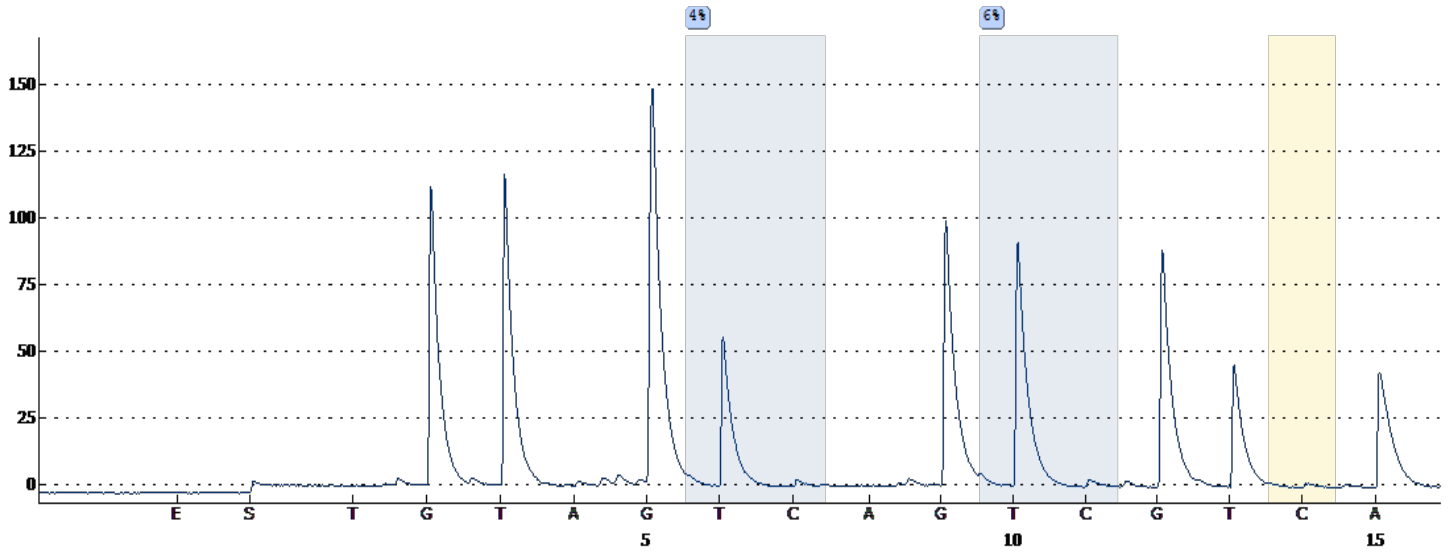

Well: C8  
Assay: 2.CG03502446-S  
Sample ID: T4  
Sequence to analyze: GGTGGGYGGTYGGTAGAAAAGTATTT

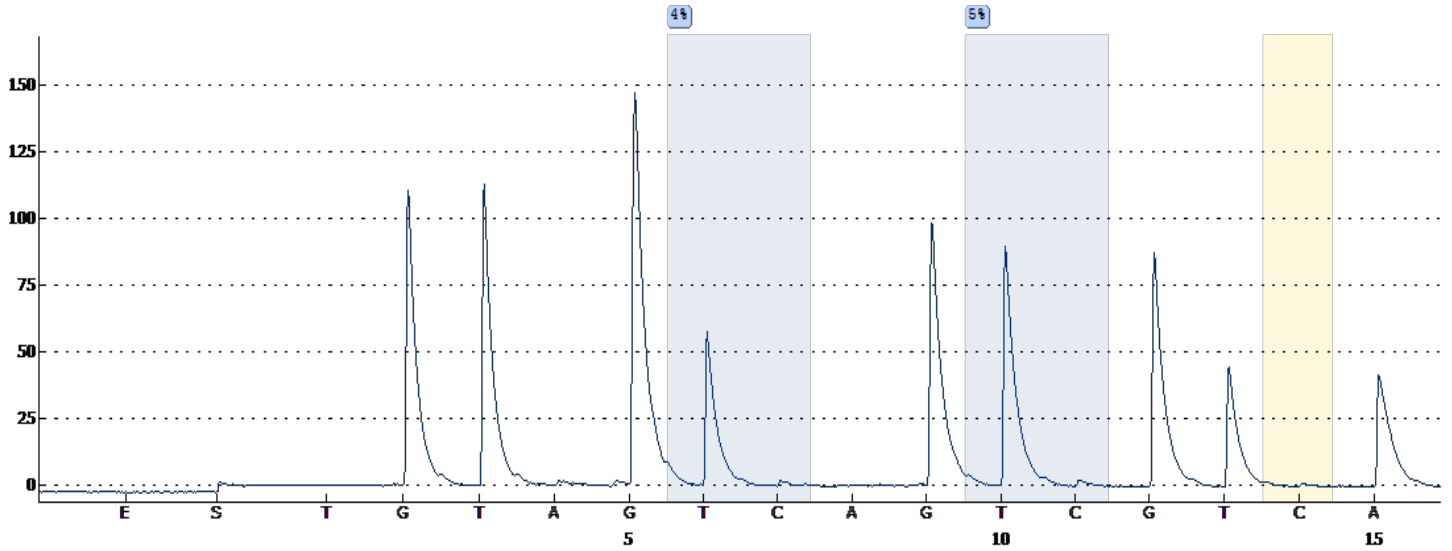

Well: C9  
Assay: 2.CG03502446-S  
Sample ID: T5  
Sequence to analyze: GGTGGGYGGTYGGTAGAAAAGTATTT

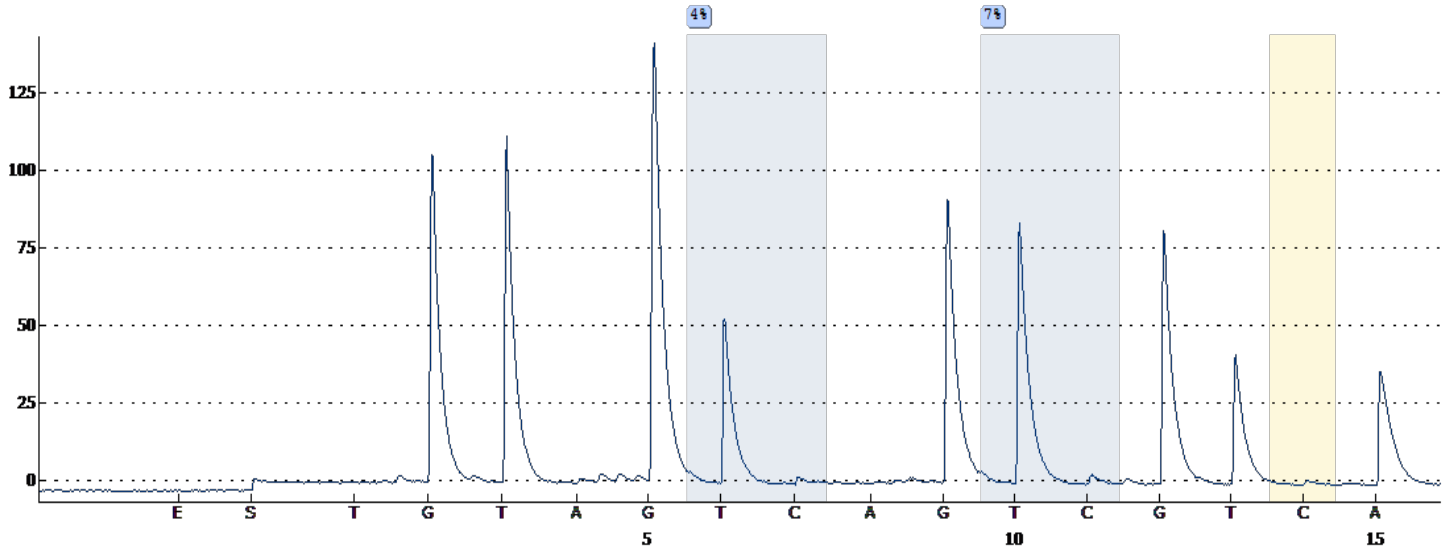

Well: C10  
Assay: 2.CG03502446-S  
Sample ID: T6  
Sequence to analyze: GGTTGGGYGGTYGGTAGAAAAGTATTT

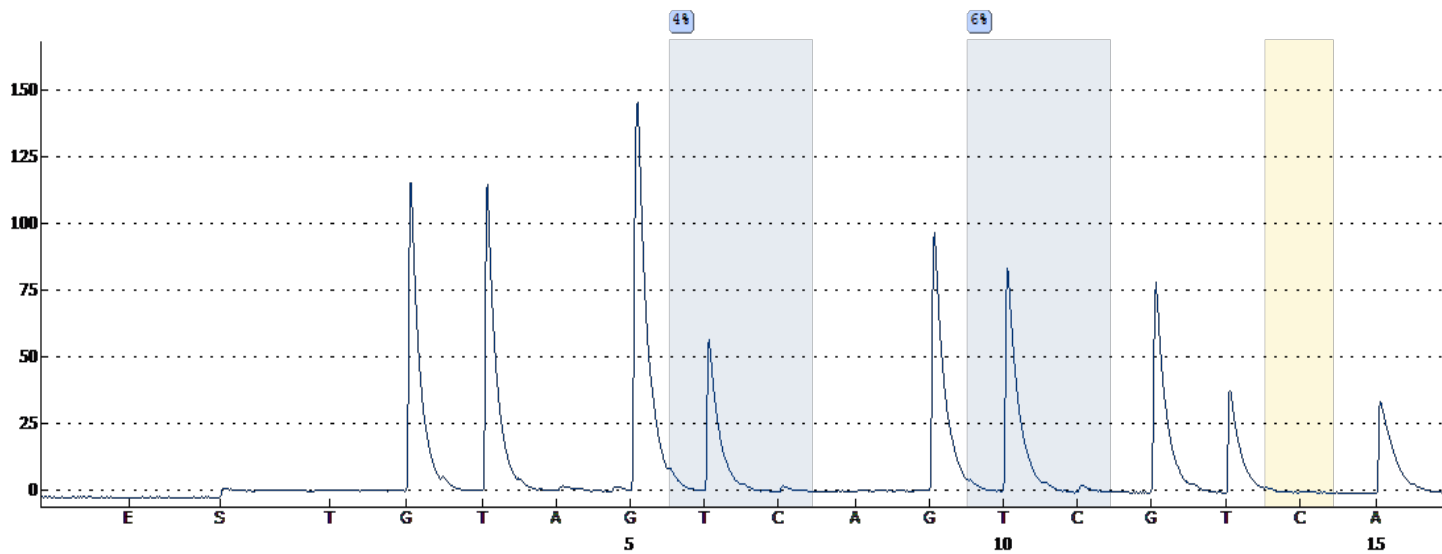

Supplement: 12967_2022_3249_MOESM2_ESM.pdf [file 12967_2022_3249_MOESM2_ESM.pdf]
