# Supplementary material for: Demethylation at enhancer upregulates MCM2 and NUP37 expression predicting poor survival in hepatocellular carcinoma patients
Source: PubMed Central journal article supplement (PMC8800332; doi:10.1186/s12967-022-03249-2), 2022-01-29
Supplement: 12967_2022_3249_MOESM1_ESM.pdf [file 12967_2022_3249_MOESM1_ESM.pdf]

## Supplementary figure legends

**Fig. S1. Representative H&E staining of HCC and paired peri-tumor tissue.**

**Fig. S2. Kaplan-Meier survival analysis was performed to investigate the impact of the methylation level of MCM2 enhancer (cg08889930 site) on overall survival of patients from TCGA cohort (n = 374 ). *p* is based on log-rank test.**

**Fig. S3. Validation of the methylation pattern of the indicated CpG islands.** (A) Results from pyrosequencing showing that the methylated percentage of CpG sites of MCM2 enhancer region (cg0889930 site) was significantly lower in HCC samples than paired nontumor samples. (B) Pyrosequencing results showing that the methylated percentage of CpG sites of CG0350244 was similar between HCC and than paired nontumor samples. (C) Pyrosequencing results showing that the methylated percentage of CpG sites of CG03502446 was significantly higher in HCC samples than in paired nontumor samples. (D) Box plot showing the mean methylated percentage of CpG sites at NUP37 promoter region was significantly higher in HCC as compared with paired nontumor samples.

**Fig. S1**

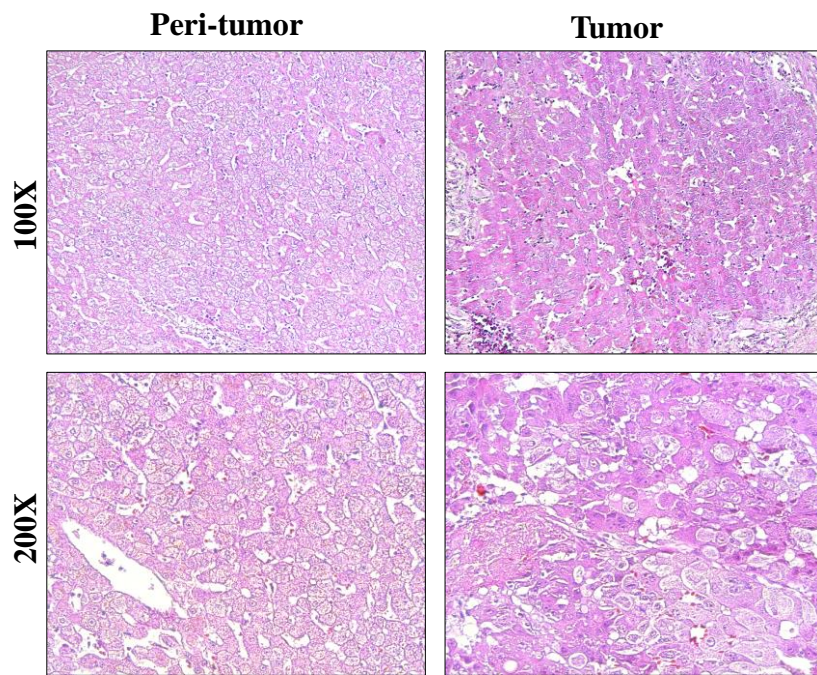

**Fig. S2**

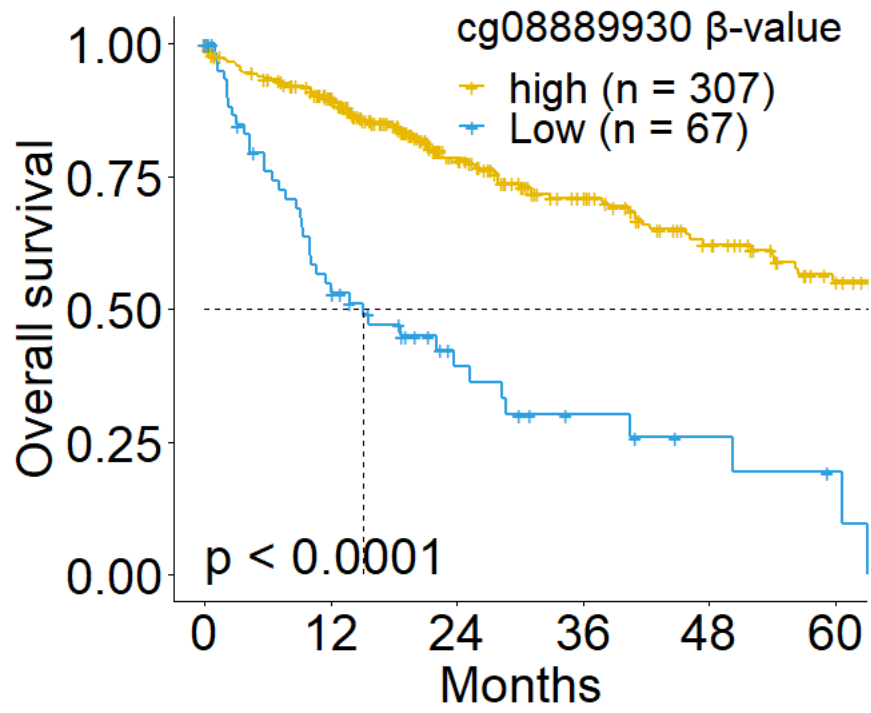

# Fig. S3

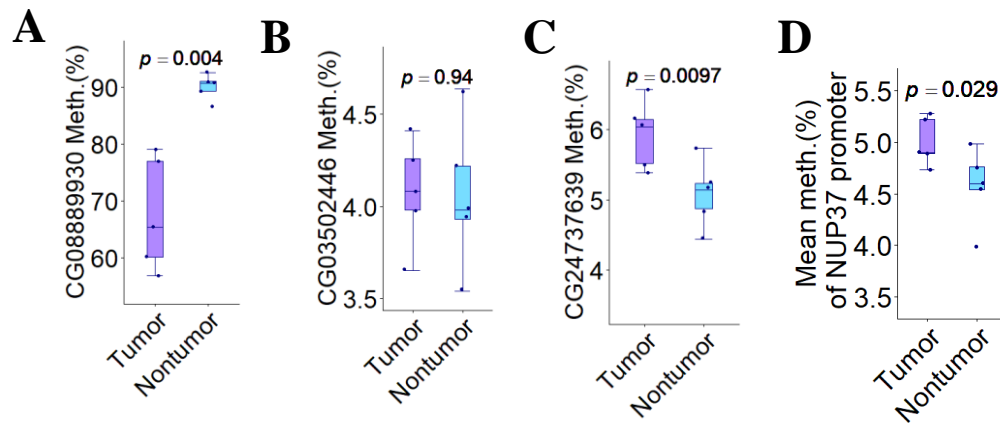

**Supplementary Table 1. Clinicopathological Features of HCC Patients (n = 300)**

|                                           |                       |
|-------------------------------------------|-----------------------|
| <b>Age, median (range), year</b>          | 61 (18-88)            |
| <b>Gender (F: M), n (%)</b>               | 39 (13.0): 261 (87.0) |
| <b>Histological grade, n (%)</b>          |                       |
| <b>Low/Low-moderate</b>                   | 67 (22.3)             |
| <b>Moderate/Moderate-well</b>             | 207 (69.0)            |
| <b>Well</b>                               | 26 (8.7)              |
| <b>Tumor size, mean (range), cm</b>       | 4.8 (1.0-18.0)        |
| <b>AFP, mean (range), ug/L</b>            | 2434 (1-200000)       |
| <b>ALT, mean (range), U/L</b>             | 46 (6-702)            |
| <b>AST, mean (range), U/L</b>             | 56 (11-1597)          |
| <b>T-stage, n (%)</b>                     |                       |
| <b>T1a</b>                                | 63 (21.0)             |
| <b>T1b</b>                                | 105 (35.0)            |
| <b>T2</b>                                 | 90 (30.0)             |
| <b>T3</b>                                 | 11 (3.7)              |
| <b>T4</b>                                 | 31(10.3)              |
| <b>N-stage, n (%)</b>                     |                       |
| <b>N0</b>                                 | 291 (97.0)            |
| <b>N1</b>                                 | 2 (2.0)               |
| <b>Nx</b>                                 | 1(1.0)                |
| <b>M-stage, n (%)</b>                     |                       |
| <b>M0</b>                                 | 289 (96.3)            |
| <b>M1</b>                                 | 11 (3.7)              |
| <b>TNM-stage, n (%)</b>                   |                       |
| <b>IA/IB</b>                              | 63 (21.0)/102 (34.0)  |
| <b>II</b>                                 | 86 (28.7)             |
| <b>IIIA/IIIB</b>                          | 12 (4.0)/24 (8.0)     |
| <b>IVA/IVB</b>                            | 5 (1.7)/8 (2.7)       |
| <b>Hypertension (yes: no), n (%)</b>      | 76 (25.3): 224 (74.7) |
| <b>Diabetes (yes: no), n (%)</b>          | 28 (9.3): 272 (90.7)  |
| <b>Liver cirrhosis (yes: no), n (%)</b>   | 31 (10.3): 269 (89.7) |
| <b>Fatty liver (yes: no), n (%)</b>       | 32 (10.7): 268 (89.3) |
| <b>Hepatitis B virus (yes: no), n (%)</b> | 221 (73.7): 79 (26.3) |

HCC, hepatocellular carcinoma; F, female; M, male; AFP,  $\alpha$ -fetoprotein; ALT, alanine aminotransferase; AST, aspartate aminotransferase;

**Supplementary Table 2. Primer sequences and location of CpG sites tested using bisulfite pyrosequencing**

| Sequence name              | primer     | Sequence (5' → 3')                    | Sequence to Analyze           | Strand | CpG site location (hg19) |
|----------------------------|------------|---------------------------------------|-------------------------------|--------|--------------------------|
| CG08889930                 | Forward    | /5'Biotin/TTTGTTTTGGTGGTTTTTTTATGTTAT | RCAAAATATT ATAATAAAAA TAACAT  | +      | chr3:127317798 (CG1)     |
|                            | Reverse    | CTCCCCTTAAACATTAAACCTATTCA            |                               |        |                          |
|                            | Sequencing | ATTCAACACACACAATAC                    |                               |        |                          |
| CG03502446 &<br>CG24737639 | Forward    | GGAAGGAAGAATTTTTGGGAATAG              | GGTTGGGYGG TYGGTAGAAA AGTATTT | +      | chr12:102513777 (CG2)    |
|                            | Reverse    | /5'Biotin/CCAAAAAACCACCTACCTCTAA      |                               |        | chr12:102513781 (CG3)    |
|                            | Sequencing | TGGGAATAGAGTGGTAA                     |                               |        |                          |

/5Biosg/ = 5' biotin added
